# Supplementary material for: Risk factors for scabies in hospital: a systematic review
Source: Springer Nature journal article supplement (doi:10.1186/s12879-024-09167-6), 2024-03-26

S1 Figure. PRISMA flow diagram

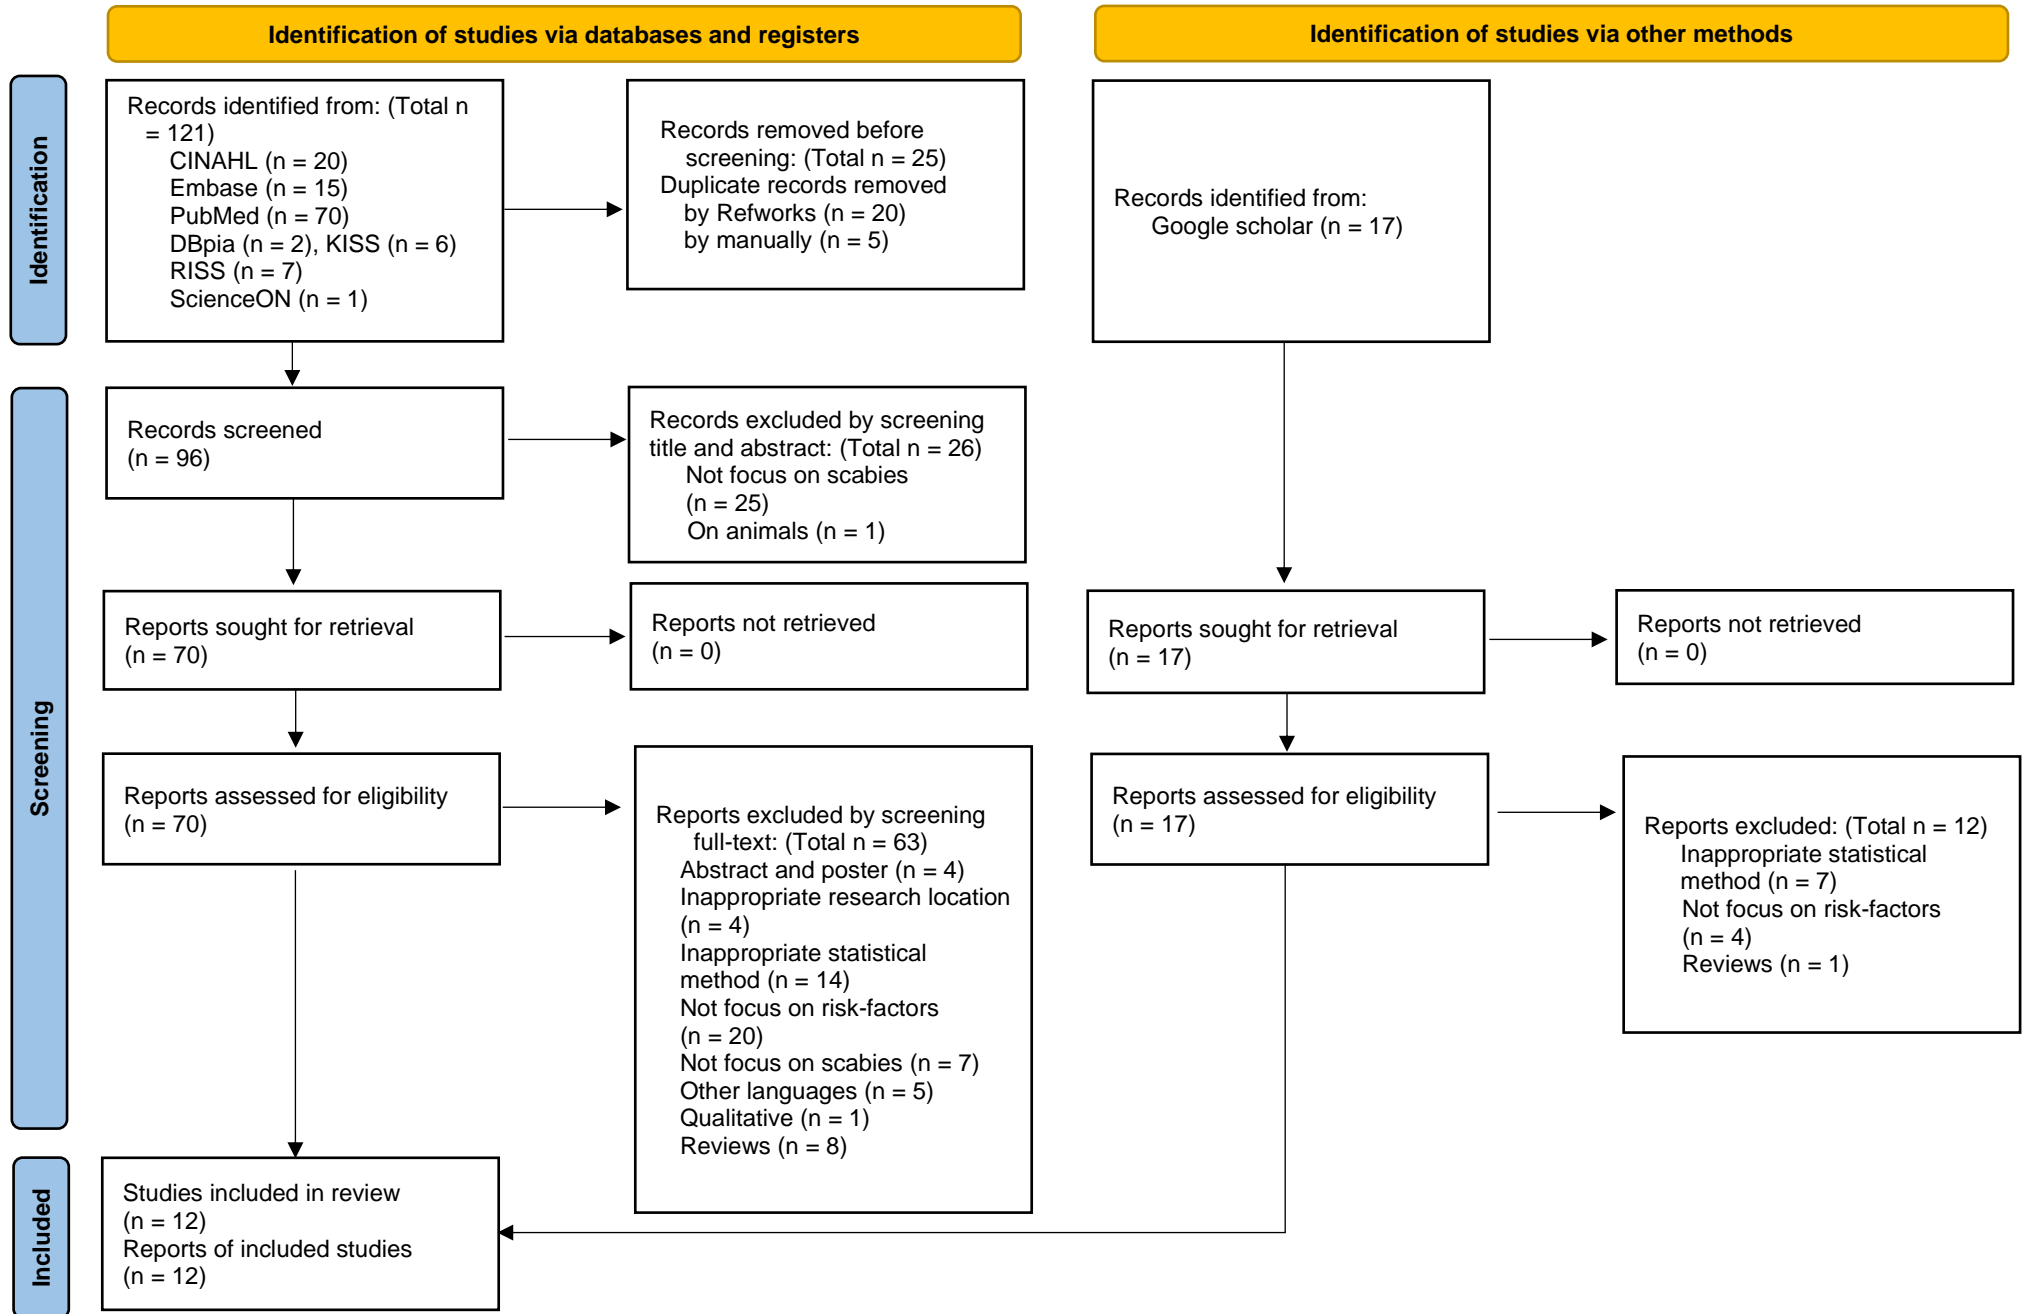

Supplement: MOESM4 [file 26945046]
